# Supplementary material for: Surface functionalization of natural hydroxyapatite by polymerization of β-cyclodextrin: Application as electrode material for the electrochemical detection of Pb(II)
Source: Research Square preprint supplement (doi:10.21203/rs.3.rs-421772/v1), 2021-05-11
Supplement: Supplementary file 1 [file fe74ad2c0f424f65218dc79b.docx]

**Figure SI(1):** Variation of peak current over successive measurements. The inset shows eight successive DPASV recorded after 3 min accumulation from an aqueous 2 × 10-6 M Pb2+ solution at pH 6 using GCE/NHAPP05-CA-βcd. Detection in 0.1 M acetate buffer (pH 5) after 15 s electrolysis at -0.8 V.
